# Supplementary material for: Distribution and orientation study of dyes intercalated into single sepiolite fibers. A confocal fluorescence microscopy approach
Source: Royal Society of Chemistry journal article supplement (doi:10.1039/c0jm02211j), 2010-10-21

**Supporting Information for:**  
**“Distribution and Orientation Study of Dyes Intercalated into Single  
Sepiolite Fibers. A Confocal Fluorescence Microscopy Approach”**

*Virginia Martínez-Martínez\*, Cecilia Corcóstegui, Jorge Bañuelos Prieto, Leire Gartzia,*

*Sandra Salleres and Iñigo López Arbeloa\**

*Departamento de Química Física, Universidad del País Vasco, UPV/EHU, Apartado*

*644, 48080-Bilbao, Spain.*

**EMAIL** [virginia.martinez@ehu.es](mailto:virginia.martinez@ehu.es) or [inigo.lopezarbeloa@ehu.es](mailto:inigo.lopezarbeloa@ehu.es)

**Fig. S1.** Typical intensity profiles for dye/Sep particles: (A) along the main C-axis and (B) along the short b-axis.

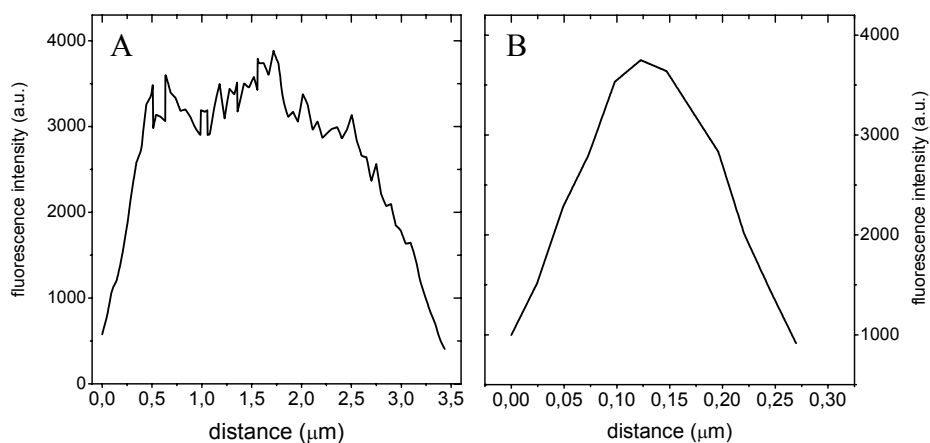

**Fig. S2.** Polarized intensity fluorescence images of 50% CEC R6G/Sep fiber. Arrows indicates the direction of polarization registered in each detection channel.

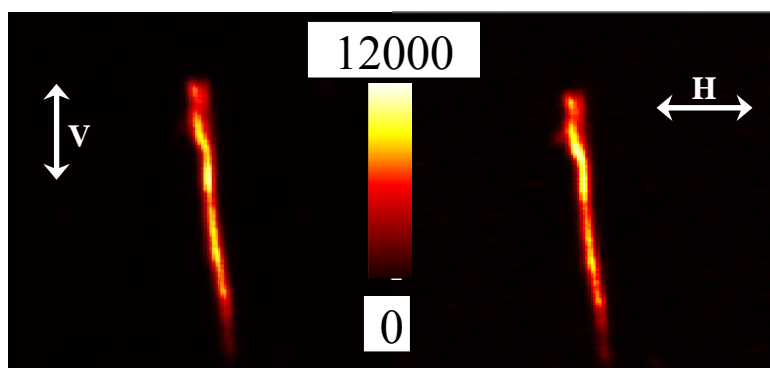

**Fig. S3.** (A) FLIM image of a single Sepiolite fiber dopped with LDS 698; (B) Fluorescence decay curve of the dye/Sep fiber (inset: residuals); (C) Histogram of the fitted lifetimes.

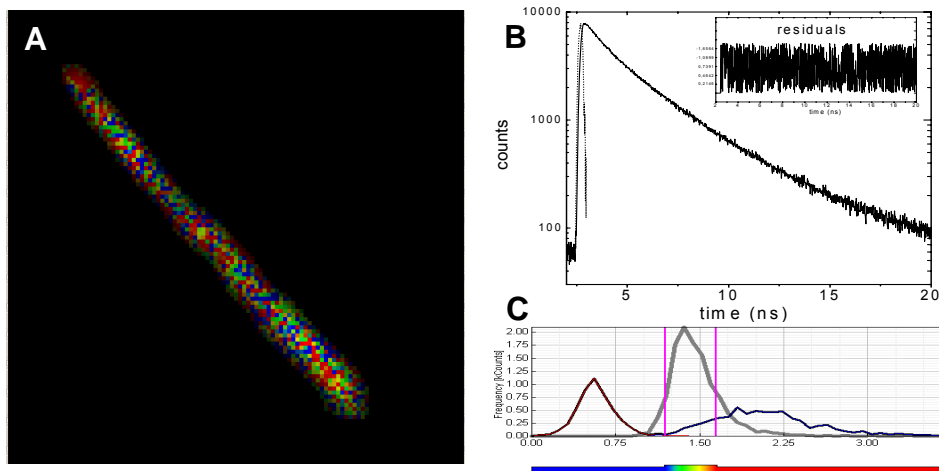

**Fig. S4.** Absorption and fluorescence spectra of LDS 698 (green) and LDS 722 (blue) in ethanol; solid lines indicates diluted dye solutions ( $C = 10^{-6}$  M) measured with cuvettes of 1 cm of optical path) and dashed lines concentrated dye solutions ( $C = 10^{-3}$  M) measured in cuvettes with 0.001 cm of optical path)

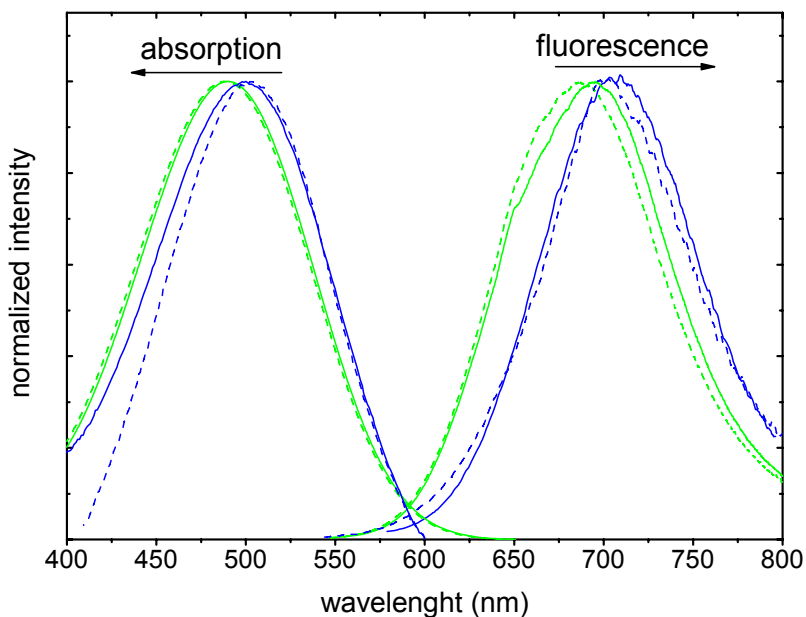

**Fig. S5.** (A) Fluorescence spectra and (B) Fluorescence decay curves of LDS 698 in ethanol (red) and in HEMA polymer matrix(Hydroxyethylmethacrylate).

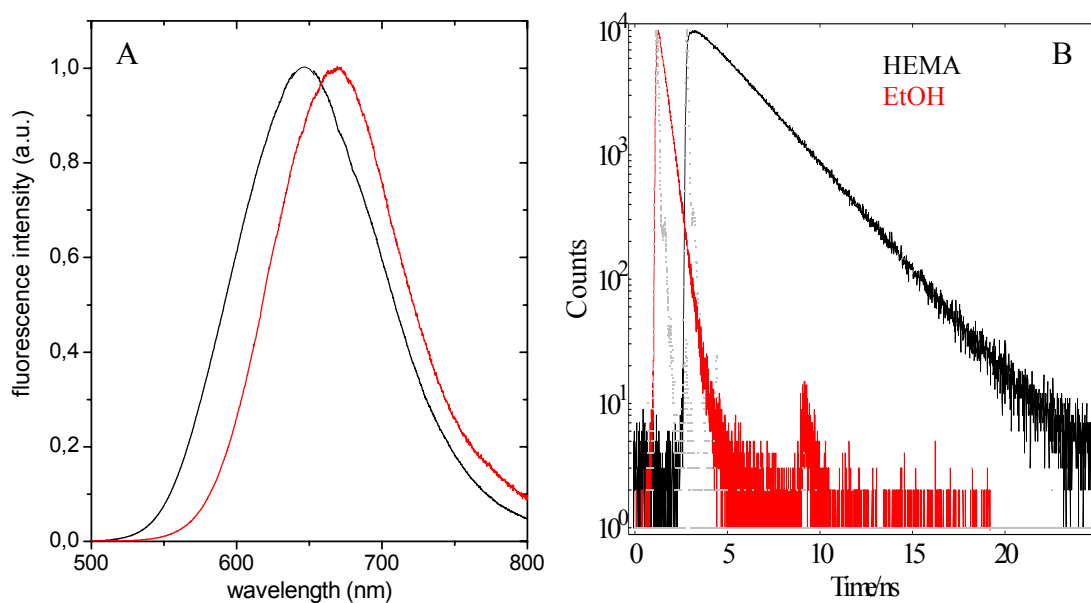

**Table S1:** Spectroscopic data of LDS 698 and LDS 722 in ethanol and embedded in the matrix of HEMA (Hydroxyethylmethacrylate) polymer.

|                    | $\lambda_{ab}(nm)$ | $\epsilon_{max} (10^4 M^{-1} cm^{-1})$ | $\lambda_{fl} (nm)$ | $\phi$ | $\tau (ns)$ |
|--------------------|--------------------|----------------------------------------|---------------------|--------|-------------|
| <b>LDS698</b>      | 490.5              | 3.1                                    | 670.0               | 0.093  | 0.36        |
| <b>LDS698/HEMA</b> | 486.5              | 2.7                                    | 647.0               | 0.22   | 2.67        |
| <b>LDS722</b>      | 504.5              | 3.3                                    | 695.0               | 0.14   | 0.58        |
| <b>LDS722/HEMA</b> | 507.5              | 2.3                                    | 665.0               | 0.35   | 2.54        |

**Fig. S6.** Fluorescence decay curves registered in both detectors: parallel (black) and perpendicular (red) with respect to the long axis of LDS 698/Sep fiber. Dichroic ratio,  $D = I_{\parallel} / I_{\perp}$ , analyzed at different time windows; markers corresponds to the part of the decay fitted for short and long lifetime of the LDS 698 adsorbed in Sep.

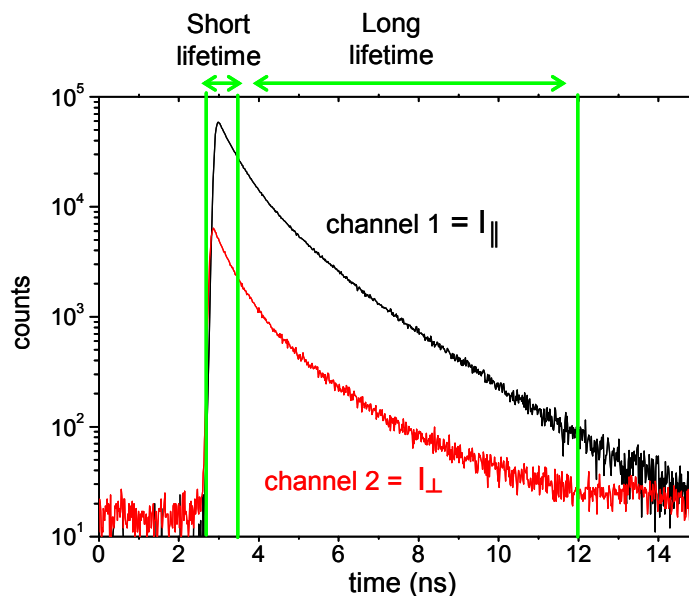

**Fig. S7.** FLIM image of LDS722/Sep 130% CEC together with the histogram of lifetimes.

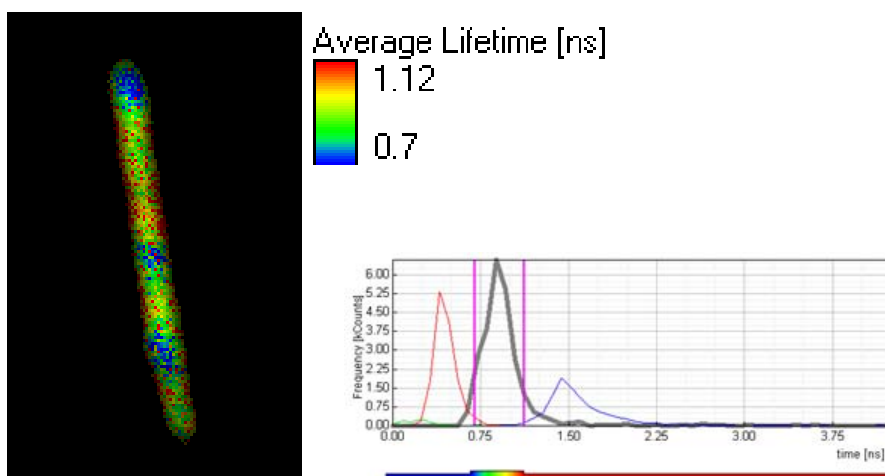

**Fig. S8.** Emission spectra of LDS 722 in solution (black line) and LDS 722 in single Sepiolite particle (red), measure in the same conditions in a Fluorescence Confocal Microscope by a spectrograph and a CCD camera mounted in a side port.

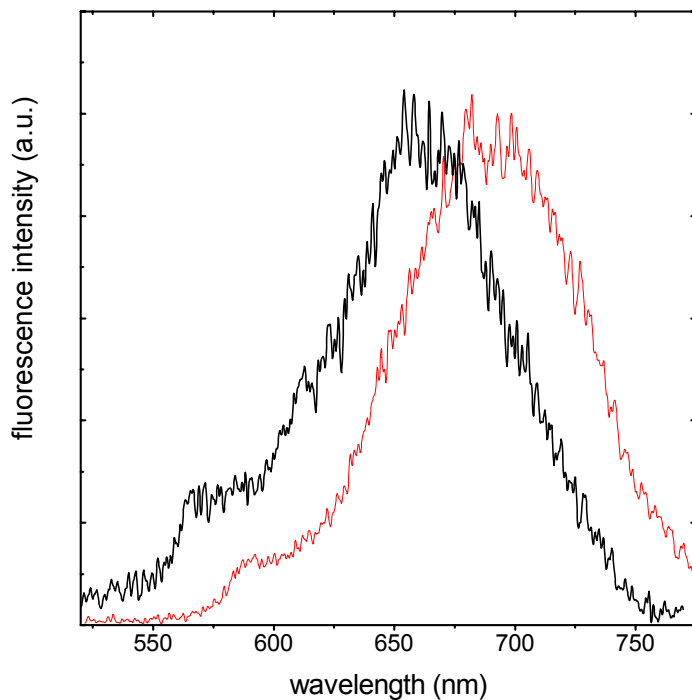

**Fig. S9.** FLIM image (left) of 6% CEC PY/Sep; Fluorescence decay curve along the particle (top right) and histogram of lifetimes (bottom right)

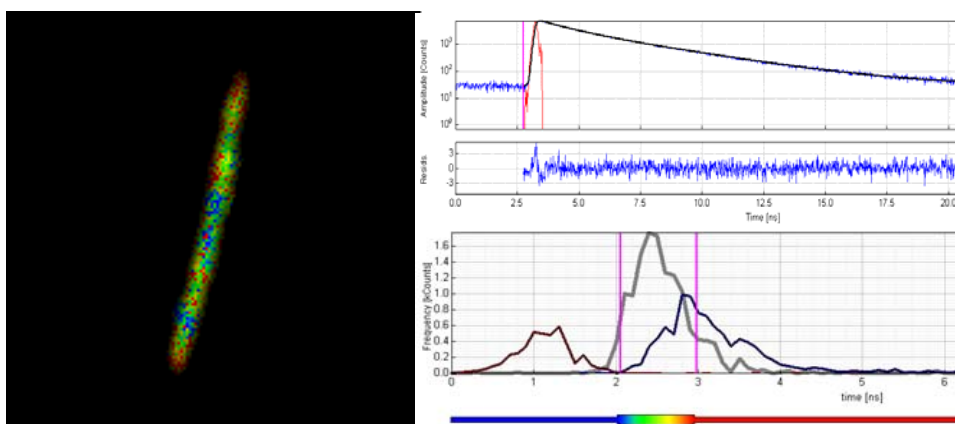

Supplement: c0jm02211j.pdf [file c0jm02211j.pdf]
